# Supplementary material
Source: HighWire-hosted journal article supplement (http://www.jneurosci.org/highwire/filestream/599802/field_highwire_adjunct_files/2/fig_3.pdf)

*Allene et al. Supp. Fig. 3*

**A**

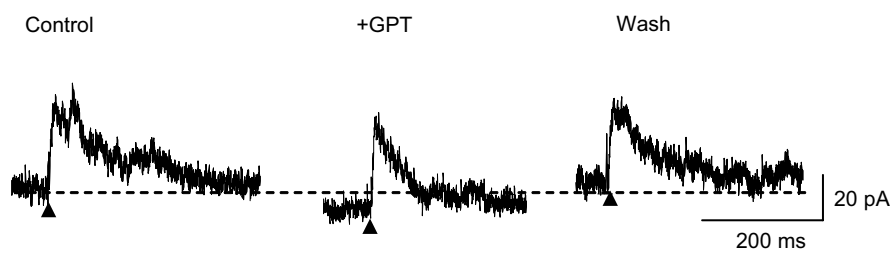

**B**

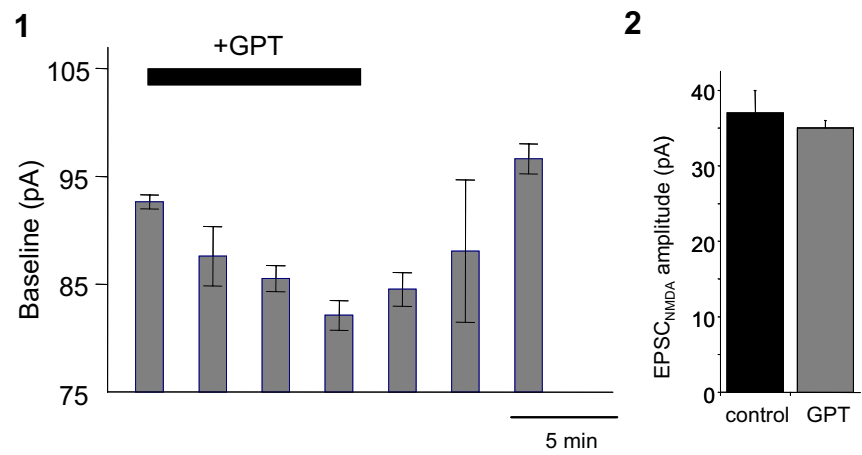

Supplement: fig_3.pdf [file fig_3.pdf]
